# Supplementary material for: Why alloying with noble metals does not decrease the oxidation of platinum: a DFT-based ab initio thermo-dynamics study
Source: Royal Society of Chemistry journal article supplement (doi:10.1039/d4cp01807a), 2024-01-01
Supplement: d4cp01807a1.pdf [file d4cp01807a1.pdf]

Electronic Supplementary Information

# Why alloying with noble metals does not decrease the oxidation of platinum – a DFT-based ab-initio thermodynamics study

Alexander Kafka and Franziska Hess\*

*Technische Universität Berlin,  
Straße des 17. Juni 124, 10623 Berlin, Germany*

## Table of contents:

|          |                                                                                                                                                                                              |    |
|----------|----------------------------------------------------------------------------------------------------------------------------------------------------------------------------------------------|----|
| Tab. S1  | Structure and thermodynamic properties of all investigated phases compared to literature values.                                                                                             | 2  |
| Tab. S2  | Fit parameters obtained for the vibrational heat capacity, -enthalpy and -entropy of all crystalline phases.                                                                                 | 4  |
| Tab. S3  | Comparison of several dispersion correction methods available in VASP for the Pt(II)-oxides.                                                                                                 | 5  |
| Fig. S1  | Energy and Gibbs free energy of mixing, Gibbs free energies of platinum- and silver oxidation, as well as Gibbs free energies of electrochemical platinum- and silver oxidation of Pt–Ag.    | 6  |
| Fig. S2  | Energy and Gibbs free energy of mixing, Gibbs free energies of platinum- and gold oxidation, as well as Gibbs free energies of electrochemical platinum- and gold oxidation of Pt–Au.        | 7  |
| Fig. S3  | Energy and Gibbs free energy of mixing, Gibbs free energies of platinum- and cobalt oxidation, as well as Gibbs free energies of electrochemical platinum- and cobalt oxidation of Pt–Co.    | 8  |
| Fig. S4  | Energy and Gibbs free energy of mixing, Gibbs free energies of platinum- and copper oxidation, as well as Gibbs free energies of electrochemical platinum- and copper oxidation of Pt–Cu.    | 9  |
| Fig. S5  | Energy and Gibbs free energy of mixing, Gibbs free energies of platinum- and iridium oxidation, as well as Gibbs free energies of electrochemical platinum- and iridium oxidation of Pt–Ir.  | 10 |
| Fig. S6  | Energy and Gibbs free energy of mixing, Gibbs free energies of platinum- and nickel oxidation, as well as Gibbs free energies of electrochemical platinum- and nickel oxidation of Pt–Ni.    | 11 |
| Fig. S7  | Energy and Gibbs free energy of mixing, Gibbs free energies of platinum- and rhenium oxidation, as well as Gibbs free energies of electrochemical platinum- and rhenium oxidation of Pt–Re.  | 12 |
| Fig. S8  | Energy and Gibbs free energy of mixing, Gibbs free energies of platinum- and rhodium oxidation, as well as Gibbs free energies of electrochemical platinum- and rhodium oxidation of Pt–Rh.  | 13 |
| Fig. S9  | Energy and Gibbs free energy of mixing, Gibbs free energies of platinum- and tungsten oxidation, as well as Gibbs free energies of electrochemical platinum- and tungsten oxidation of Pt–W. | 14 |
| Fig. S10 | Comparison of mean- and individual empirical enthalpy correction of the Gibbs free energies of copper- and rhodium oxidation from within Pt–Cu and Pt–Rh.                                    | 15 |

**Tab. S1:** Structure, energy of formation ( $\Delta E_f$ ), emp. corrected standard enthalpy of formation ( $\Delta H_f^0 - n_M \cdot 38.27 \text{ kJ/mol}$ ) and standard entropy ( $S^0$ ) of all crystalline and gaseous phases compared to selected literature values.

| Phase                          | Structure                                       | $\Delta E_f$<br>[kJ/mol] | $\Delta H_f^0$<br>[kJ/mol] | $\Delta H_f^0(\text{Lit.})$<br>[kJ/mol]                                  | $S^0$<br>[J/(mol·K)] | $S^0(\text{Lit.})$<br>[J/(mol·K)]              |
|--------------------------------|-------------------------------------------------|--------------------------|----------------------------|--------------------------------------------------------------------------|----------------------|------------------------------------------------|
| O <sub>2</sub>                 | <i>D<sub>∞h</sub></i>                           | 0.00                     | 0.00                       | ---                                                                      | 205.43               | 205.15 <sup>1</sup>                            |
| H <sub>2</sub>                 | <i>D<sub>∞h</sub></i>                           | 0.00                     | 0.00                       | ---                                                                      | 130.37               | 130.68 <sup>1</sup>                            |
| H <sub>2</sub> O               | <i>C<sub>2v</sub></i>                           | -121.72                  | -111.17                    | -121.92 <sup>1</sup>                                                     | 94.47                | 94.42 <sup>1</sup>                             |
| Ag                             | <i>Fm<math>\bar{3}m</math></i>                  | 0.00                     | 0.00                       | ---                                                                      | 44.17                | 42.48 <sup>2</sup>                             |
| Ag <sub>2</sub> O              | <i>Pn<math>\bar{3}m</math></i>                  | -5.91                    | -43.39                     | -15.34 <sup>3</sup>                                                      | 62.51                | 60.95 <sup>3</sup>                             |
| Au                             | <i>Fm<math>\bar{3}m</math></i>                  | 0.00                     | 0.00                       | ---                                                                      | 51.20                | 47.35 <sup>4</sup> , 47.29 <sup>5</sup>        |
| Au <sub>2</sub> O <sub>3</sub> | <i>Fdd2</i>                                     | -19.80                   | -55.16                     | ---                                                                      | 56.86                | ---                                            |
| α-Co                           | <i>P6<sub>3</sub>/mmc</i>                       | 0.00                     | 0.00                       | ---                                                                      | 27.47                | 30.04 <sup>6</sup> , 30.03 <sup>7</sup>        |
| β-Co                           | <i>Fm<math>\bar{3}m</math></i>                  | 1.44                     | 1.33                       | ---                                                                      | 29.43                | 30.66 <sup>6</sup>                             |
| CoO                            | <i>P2/m</i> <sup>a.)</sup>                      | -126.51                  | -164.99                    | -236.86 <sup>8</sup> , -237.39 <sup>7</sup>                              | 48.68                | 54.31 <sup>8</sup> , 53.33 <sup>7</sup>        |
| Co <sub>3</sub> O <sub>4</sub> | <i>I4<sub>1</sub>/amd</i> <sup>a.)</sup>        | -233.78                  | -268.87                    | -305.13 <sup>8</sup>                                                     | 35.72                | 36.47 <sup>8</sup>                             |
| Pt <sub>3</sub> Co             | <i>Pm<math>\bar{3}m</math></i>                  | -5.09                    | -5.12                      | ---                                                                      | 51.06                | ---                                            |
| PtCo                           | <i>P4/mmm</i>                                   | -7.44                    | -7.50                      | ---                                                                      | 71.24                | ---                                            |
| Cu                             | <i>Fm<math>\bar{3}m</math></i>                  | 0.00                     | 0.00                       | ---                                                                      | 33.81                | 33.13 <sup>9</sup> , 33.18 <sup>7</sup>        |
| Cu <sub>2</sub> O              | <i>Pn<math>\bar{3}m</math></i>                  | -46.42                   | -83.45                     | -85.13 <sup>10</sup> , -85.12 <sup>7</sup>                               | 49.53                | 46.34 <sup>10</sup> , 46.18 <sup>7</sup>       |
| CuO                            | <i>C2/c</i>                                     | -108.38                  | -145.32                    | -155.19 <sup>10</sup>                                                    | 45.42                | 43.06 <sup>10</sup>                            |
| Pt <sub>3</sub> Cu             | <i>Cmmm</i>                                     | -10.83                   | -10.83                     | ---                                                                      | 52.46                | ---                                            |
| PtCu                           | <i>R<math>\bar{3}m</math></i>                   | -14.41                   | -14.41                     | ---                                                                      | 75.09                | ---                                            |
| Ir                             | <i>Fm<math>\bar{3}m</math></i>                  | 0.00                     | 0.00                       | ---                                                                      | 36.43                | 35.49 <sup>11</sup>                            |
| IrO <sub>2</sub>               | <i>P4<sub>2</sub>/mnm</i>                       | -230.45                  | -263.05                    | -249.50 <sup>12</sup> , -249.37 <sup>13</sup>                            | 49.07                | 51.01 <sup>13</sup>                            |
| IrO <sub>2</sub>               | <i>C<sub>2v</sub></i>                           | 192.16                   | 190.66                     | 188.20 <sup>14</sup>                                                     | 286.07               | 274.11 <sup>14</sup>                           |
| IrO <sub>3</sub>               | <i>C<sub>2v</sub></i>                           | -9.88                    | -10.14                     | ~ 22.00 <sup>15 b.)</sup>                                                | 330.23               | 303.20 <sup>15 b.)</sup>                       |
| Ni                             | <i>Fm<math>\bar{3}m</math></i>                  | 0.00                     | 0.00                       | ---                                                                      | 27.72                | 29.86 <sup>16</sup> , 29.87 <sup>7</sup>       |
| NiO                            | <i>P2/m</i> <sup>a.)</sup>                      | -125.43                  | -163.34                    | -239.84 <sup>17</sup>                                                    | 44.20                | 37.99 <sup>7</sup>                             |
| Pt <sub>3</sub> Ni             | <i>Pm<math>\bar{3}m</math></i>                  | -5.90                    | -5.93                      | ---                                                                      | 51.46                | ---                                            |
| PtNi                           | <i>P4/mmm</i>                                   | -8.68                    | -8.73                      | ---                                                                      | 71.23                | ---                                            |
| Pt                             | <i>Fm<math>\bar{3}m</math></i>                  | 0.00                     | 0.00                       | ---                                                                      | 42.07                | 41.53 <sup>18</sup>                            |
| PtO                            | <i>P4<sub>2</sub>/mmc</i>                       | -42.80                   | -78.49                     | -88.50 <sup>19</sup>                                                     | 45.87                | ---                                            |
| Pt <sub>3</sub> O <sub>4</sub> | <i>Pm<math>\bar{3}n</math></i>                  | -98.03                   | -133.09                    | -121.11 <sup>19</sup>                                                    | 54.55                | ---                                            |
| PtO <sub>2</sub>               | <i>P<math>\bar{3}m</math>1</i>                  | -134.26                  | -167.61                    | ---                                                                      | 51.33                | ---                                            |
| PtO <sub>2</sub>               | <i>Pnnm</i>                                     | -147.67                  | -180.89                    | -191.00 <sup>19</sup>                                                    | 50.43                | ---                                            |
| PtO <sub>2</sub>               | <i>C<sub>2v</sub></i>                           | 160.69                   | 160.57                     | 218.00 <sup>20</sup> , ~164.00 <sup>21-23</sup>                          | 259.89               | ~ 250.00 <sup>21-23</sup>                      |
| Re                             | <i>P6<sub>3</sub>/mmc</i>                       | 0.00                     | 0.00                       | ---                                                                      | 38.27                | 36.48 <sup>24</sup>                            |
| ReO <sub>2</sub>               | <i>P2<sub>1</sub>/c</i>                         | -399.67                  | -433.09                    | ---                                                                      | 50.52                | ---                                            |
| ReO <sub>2</sub>               | <i>Pbcn</i>                                     | -423.79                  | -456.67                    | -445.15 <sup>25</sup> , -444.30 <sup>26</sup> ,<br>-448.94 <sup>27</sup> | 47.75                | 47.83 <sup>25</sup> , 47.82 <sup>27</sup>      |
| ReO <sub>3</sub>               | <i>Pm<math>\bar{3}m</math></i>                  | -608.26                  | -640.03                    | -601.90 <sup>28</sup> , -589.11 <sup>27</sup>                            | 67.97                | 69.25 <sup>27</sup>                            |
| Re <sub>2</sub> O <sub>7</sub> | <i>P2<sub>1</sub>2<sub>1</sub>2<sub>1</sub></i> | -637.68                  | -667.39                    | -631.58 <sup>27</sup>                                                    | 104.20               | 103.64 <sup>27</sup>                           |
| Re <sub>2</sub> O <sub>7</sub> | <i>C<sub>2v</sub></i>                           | -572.58                  | -567.95                    | -566.30 <sup>28</sup>                                                    | 235.01               | 219.35 <sup>28</sup>                           |
| Rh                             | <i>Fm<math>\bar{3}m</math></i>                  | 0.00                     | 0.00                       | ---                                                                      | 32.01                | 31.56 <sup>11</sup>                            |
| Rh <sub>2</sub> O <sub>3</sub> | <i>Pbca</i>                                     | -173.12                  | -207.77                    | -202.77 <sup>29</sup> , -202.98 <sup>30</sup>                            | 39.63                | 37.85 <sup>29</sup> , 35.75 <sup>30</sup>      |
| Rh <sub>2</sub> O <sub>3</sub> | <i>R<math>\bar{3}c</math></i>                   | -170.66                  | -205.34                    | ---                                                                      | 39.67                | ---                                            |
| RhO <sub>2</sub>               | <i>P4<sub>2</sub>/mnm</i>                       | -243.29                  | -276.41                    | -244.94 <sup>31</sup>                                                    | 46.05                | 45.11 <sup>31</sup>                            |
| RhO <sub>2</sub>               | <i>C<sub>2v</sub></i>                           | 174.61                   | 173.23                     | 188.87 <sup>21,22</sup> , 200.13 <sup>23</sup>                           | 255.32               | 257.30 <sup>21,22</sup> , 264.40 <sup>23</sup> |

a.) The *Fd $\bar{3}m$* - and *Fm $\bar{3}m$* -structures of Co<sub>3</sub>O<sub>4</sub> and CoO / NiO are distorted due to their magnetic structure.

b.) and references therein

**Tab. S1:** Structure, energy of formation ( $\Delta E_f$ ), emp. corrected standard enthalpy of formation ( $\Delta H_f^0 - n_M \cdot 38.27 \text{ kJ/mol}$ ) and standard entropy ( $S^0$ ) of all crystalline and gaseous phases compared to selected literature values.(continued)

| Phase                           | Structure    | $\Delta E_f$<br>[kJ/mol] | $\Delta H_f^0$<br>[kJ/mol] | $\Delta H_f^0(\text{Lit.})$<br>[kJ/mol]      | $S^0$<br>[J/(mol·K)] | $S^0(\text{Lit.})$<br>[J/(mol·K)]        |
|---------------------------------|--------------|--------------------------|----------------------------|----------------------------------------------|----------------------|------------------------------------------|
| W                               | $Im\bar{3}m$ | 0.00                     | 0.00                       | ---                                          | 34.04                | 32.66 <sup>32</sup>                      |
| WO <sub>2</sub>                 | $P2_1/c$     | -562.31                  | -596.16                    | -586.55 <sup>33</sup> , -589.69 <sup>1</sup> | 50.84                | 50.53 <sup>1</sup>                       |
| WO <sub>2</sub>                 | $C_{2v}$     | 25.24                    | 24.78                      | ~76.57 <sup>1</sup>                          | 273.53               | 285.50 <sup>1</sup>                      |
| W <sub>18</sub> O <sub>49</sub> | $P2/m$       | -759.66                  | -792.31                    | -779.70 <sup>33</sup> , -781.15 <sup>1</sup> | 67.21                | 68.43 <sup>1</sup>                       |
| WO <sub>3</sub>                 | $P2_1/c$     | -822.09                  | -853.90                    | ---                                          | 78.45                | ---                                      |
| WO <sub>3</sub>                 | $Pnma$       | -821.66                  | -853.34                    | -842.91 <sup>1,33</sup>                      | 80.15                | 76.57 <sup>34</sup> , 75.91 <sup>1</sup> |
| WO <sub>3</sub>                 | $P4/ncc$     | -820.59                  | -853.29                    | ---                                          | 78.98                | ---                                      |
| WO <sub>3</sub>                 | $C_{3v}$     | -326.08                  | -325.04                    | ~ -292.88 <sup>1</sup>                       | 290.70               | 286.44 <sup>1</sup>                      |
| Pt <sub>2</sub> W               | $Immm$       | -34.46                   | -34.47                     | ---                                          | 56.85                | ---                                      |
| PtW                             | $P\bar{6}m2$ | -10.70                   | -10.73                     | ---                                          | 77.26                | ---                                      |

a.) The  $Fd\bar{3}m$ - and  $Fm\bar{3}m$ -structures of Co<sub>3</sub>O<sub>4</sub> and CoO / NiO are distorted due to their magnetic structure.

b.) and references therein

- 1 M. W. J. Chase, *NIST-JANAF Thermochemical Tables*, American Institute of Physics, 4th edn., 1998.
- 2 J. W. Arblaster, *J. Phase Equilib. Diffus.*, 2015, **36**, 573–591.
- 3 J. Assal, B. Hallstedt and L. J. Gauckler, *J. Am. Ceram. Soc.*, 1997, **80**, 3054–3060.
- 4 A. V. Khvan, I. A. Uspenskaya, N. M. Aristova, Q. Chen, G. Trimarchi, N. M. Konstantinova and A. T. Dinsdale, *Calphad*, 2020, **68**, 101724.
- 5 J. W. Arblaster, *J. Phase Equilib. Diffus.*, 2016, **37**, 229–245.
- 6 A. Fernández Guillermet, *Int. J. Thermophys.*, 1987, **8**, 481–510.
- 7 R. D. Holmes, H. S. C. O'Neill and R. J. Arculus, *Geochim. Cosmochim. Acta*, 1986, **50**, 2439–2452.
- 8 M. Chen, B. Hallstedt and L. J. Gauckler, *J. Phase Equilibria*, 2003, **24**, 212–227.
- 9 J. W. Arblaster, *J. Phase Equilib. Diffus.*, 2015, **36**, 422–444.
- 10 B. Hallstedt, D. Risold and L. J. Gauckler, *J. Phase Equilibria*, 1994, **15**, 483–499.
- 11 J. W. Arblaster, *Platin. Met. Rev.*, 1996, **40**, 62–63.
- 12 H. S. C. O'Neill and J. Nell, *Geochim. Cosmochim. Acta*, 1997, **61**, 5279–5293.
- 13 E. H. P. Cordfunke, *Thermochim. Acta*, 1981, **50**, 177–185.
- 14 R. T. Wimber, S. W. Hills, N. K. Wahl and C. R. Tempero, *Metall. Trans. A*, 1977, **8**, 193–199.
- 15 J. H. Carpenter, *J. Less-Common Met.*, 1989, **152**, 35–45.
- 16 P. D. Desai, *Int. J. Thermophys.*, 1987, **8**, 763–780.
- 17 H. S. C. O'Neill and M. I. Pownceby, *Contrib. Mineral. Petrol.*, 1993, **114**, 296–314.
- 18 J. W. Arblaster, *Platin. Met. Rev.*, 2005, **49**, 141–149.
- 19 C.-B. Wang, H.-K. Lin, S.-N. Hsu, T.-H. Huang and H.-C. Chiu, *J. Mol. Catal. A: Chem.*, 2002, **188**, 201–208.
- 20 M. Citir, R. B. Metz, L. Belau and M. Ahmed, *J. Phys. Chem. A*, 2008, **112**, 9584–9590.
- 21 C. B. Alcock and G. W. Hooper, *Proc. R. Soc. London, Ser. A.*, 1960, **254**, 551–561.
- 22 C. B. Alcock, *Platin. Met. Rev.*, 1961, **5**, 134–139.
- 23 A. Olivei, *J. Less-Common Met.*, 1972, **29**, 11–23.
- 24 J. W. Arblaster, *Calphad*, 1996, **20**, 343–352.
- 25 K. T. Jacob, S. Mishra and Y. Waseda, *Thermochim. Acta*, 2000, **348**, 61–68.
- 26 M. I. Pownceby and H. S. C. O'Neill, *Contrib. Mineral. Petrol.*, 1994, **118**, 130–137.
- 27 J. M. Stuve and M. J. Ferrante, *Thermodynamic properties of rhenium oxides, 8 to 1,400 K*, Dept. of the Interior, Bureau of Mines, Washington, D.C., 1976.
- 28 H. Oppermann, *Z. Anorg. Allg. Chem.*, 1985, **523**, 135–144.
- 29 K. T. Jacob, T. Uda, T. H. Okabe and Y. Waseda, *High. Temp. Mat. Pr.-ISR*, 2000, **19**, 11–16.
- 30 J. Nell and H. S. C. O'Neill, *Geochim. Cosmochim. Acta*, 1997, **61**, 4159–4171.
- 31 K. T. Jacob and D. Prusty, *J. Alloys Compd.*, 2010, **507**, L17–L20.
- 32 J. W. Arblaster, *J. Phase Equilib. Diffus.*, 2018, **39**, 891–907.
- 33 T. V. Charlu and O. J. Kleppa, *J. Chem. Thermodyn.*, 1973, **5**, 325–330.
- 34 B.-y. Han, A. V. Khoroshilov, A. V. Tyurin, A. E. Baranchikov, M. I. Razumov, O. S. Ivanova, K. S. Gavrichev and V. K. Ivanov, *J. Therm. Anal. Calorim.*, 2020, **142**, 1533–1543.

**Tab. S2:** Fit parameters obtained for the vibrational heat capacity  $C_{vib}(T)$ , enthalpy  $H_{vib}(T)$  and entropy  $S_{vib}(T)$  of all crystalline phases between 300 K and 1300 K per formula unit. The corrected single-point energy  $E_{corr}$  already contains the mean empirical correction of 38.27 kJ/mol per metal atom. Please see below, how the parameters are related.

| Phase                           | Structure    | $E_{corr}$<br>[kJ/mol] | $a_1$<br>[J/(mol·K)] | $a_2$<br>[J/(mol·K <sup>2</sup> )] | $a_3$<br>[J/(mol·K <sup>3</sup> )] | $a_4$<br>[J/(mol·K <sup>4</sup> )] | $a_5$<br>[J·K/mol] | $a_6$<br>[J/mol] | $a_7$<br>[J/(mol·K)] |
|---------------------------------|--------------|------------------------|----------------------|------------------------------------|------------------------------------|------------------------------------|--------------------|------------------|----------------------|
| Ag                              | $Fm\bar{3}m$ | -318.27                | 2.336E+01            | 4.863E-03                          | -5.140E-06                         | 1.799E-09                          | 9.966E-01          | 4.616E+02        | -9.016E+01           |
| Ag <sub>2</sub> O               | $Pn\bar{3}m$ | -1200.57               | 5.028E+01            | 7.168E-02                          | -7.345E-05                         | 2.519E-08                          | 9.597E-01          | 7.883E+03        | -1.798E+02           |
| Au                              | $Fm\bar{3}m$ | -373.10                | 2.396E+01            | 3.038E-03                          | -3.214E-06                         | 1.125E-09                          | 9.978E-01          | 2.875E+02        | -8.606E+01           |
| Au <sub>2</sub> O <sub>3</sub>  | $Fdd2$       | -2289.35               | 5.226E+01            | 2.088E-01                          | -2.123E-04                         | 7.246E-08                          | 9.989E-01          | 2.381E+04        | -2.375E+02           |
| $\alpha$ -Co                    | $P6_3/mmc$   | -719.52                | 1.921E+01            | 1.747E-02                          | -1.836E-05                         | 6.400E-09                          | 9.881E-01          | 1.705E+03        | -8.640E+01           |
| $\beta$ -Co                     | $Fm\bar{3}m$ | -718.08                | 2.015E+01            | 1.463E-02                          | -1.540E-05                         | 5.375E-09                          | 9.899E-01          | 1.417E+03        | -8.910E+01           |
| CoO                             | $P2/m$       | -1359.96               | 3.049E+01            | 5.367E-02                          | -5.584E-05                         | 1.935E-08                          | 9.661E-01          | 5.498E+03        | -1.388E+02           |
| Co <sub>3</sub> O <sub>4</sub>  | $I4_1/amd$   | -4877.38               | 5.069E+01            | 3.589E-01                          | -3.660E-04                         | 1.252E-07                          | 9.981E-01          | 4.035E+04        | -2.735E+02           |
| Pt <sub>3</sub> Co              | $Pm\bar{3}m$ | -2726.33               | 8.933E+01            | 3.201E-02                          | -3.378E-05                         | 1.181E-08                          | 9.776E-01          | 3.061E+03        | -3.640E+02           |
| PtCo                            | $P4/mmm$     | -1396.55               | 4.328E+01            | 2.022E-02                          | -2.131E-05                         | 7.444E-09                          | 9.860E-01          | 1.945E+03        | -1.805E+02           |
| Cu                              | $Fm\bar{3}m$ | -416.84                | 2.134E+01            | 1.101E-02                          | -1.161E-05                         | 4.054E-09                          | 9.924E-01          | 1.060E+03        | -9.060E+01           |
| Cu <sub>2</sub> O               | $Pn\bar{3}m$ | -1478.72               | 4.254E+01            | 9.222E-02                          | -9.324E-05                         | 3.170E-08                          | 9.995E-01          | 1.077E+04        | -1.670E+02           |
| CuO                             | $C2/c$       | -1039.15               | 2.610E+01            | 6.996E-02                          | -7.208E-05                         | 2.481E-08                          | 9.590E-01          | 7.513E+03        | -1.212E+02           |
| Pt <sub>3</sub> Cu              | $Cmmm$       | -2446.61               | 9.015E+01            | 2.952E-02                          | -3.116E-05                         | 1.089E-08                          | 9.793E-01          | 2.819E+03        | -3.638E+02           |
| PtCu                            | $R\bar{3}m$  | -1107.82               | 4.419E+01            | 1.744E-02                          | -1.840E-05                         | 6.429E-09                          | 9.879E-01          | 1.674E+03        | -1.811E+02           |
| Ir                              | $Fm\bar{3}m$ | -923.97                | 2.228E+01            | 8.177E-03                          | -8.632E-06                         | 3.019E-09                          | 9.943E-01          | 7.805E+02        | -9.258E+01           |
| IrO <sub>2</sub>                | $P4_2/mnm$   | -2144.03               | 1.837E+01            | 1.580E-01                          | -1.577E-04                         | 5.315E-08                          | 9.993E-01          | 1.953E+04        | -9.614E+01           |
| Ni                              | $Fm\bar{3}m$ | -573.18                | 1.926E+01            | 1.729E-02                          | -1.817E-05                         | 6.336E-09                          | 9.883E-01          | 1.688E+03        | -8.644E+01           |
| NiO                             | $P2/m$       | -1212.55               | 3.057E+01            | 5.796E-02                          | -6.040E-05                         | 2.094E-08                          | 9.631E-01          | 5.897E+03        | -1.448E+02           |
| Pt <sub>3</sub> Ni              | $Pm\bar{3}m$ | -2583.23               | 8.933E+01            | 3.201E-02                          | -3.378E-05                         | 1.181E-08                          | 9.776E-01          | 3.063E+03        | -3.627E+02           |
| PtNi                            | $P4/mmm$     | -1252.68               | 4.312E+01            | 2.068E-02                          | -2.180E-05                         | 7.614E-09                          | 9.857E-01          | 1.992E+03        | -1.797E+02           |
| Pt                              | $Fm\bar{3}m$ | -662.15                | 2.296E+01            | 6.085E-03                          | -6.426E-06                         | 2.248E-09                          | 9.957E-01          | 5.796E+02        | -9.030E+01           |
| PtO                             | $P4_2/mmc$   | -1218.89               | 2.044E+01            | 8.445E-02                          | -8.560E-05                         | 2.915E-08                          | 9.996E-01          | 9.754E+03        | -9.224E+01           |
| Pt <sub>3</sub> O <sub>4</sub>  | $Pm\bar{3}n$ | -4298.03               | 6.990E+01            | 2.884E-01                          | -2.872E-04                         | 9.666E-08                          | 9.987E-01          | 3.594E+04        | -3.087E+02           |
| PtO <sub>2</sub>                | $P\bar{3}m1$ | -1786.02               | 1.877E+01            | 1.611E-01                          | -1.635E-04                         | 5.574E-08                          | 9.992E-01          | 1.850E+04        | -9.687E+01           |
| PtO <sub>2</sub>                | $Pnmm$       | -1799.44               | 2.036E+01            | 1.546E-01                          | -1.556E-04                         | 5.278E-08                          | 9.992E-01          | 1.839E+04        | -1.052E+02           |
| Re                              | $P6_3/mmc$   | -1261.66               | 2.238E+01            | 7.382E-03                          | -7.794E-06                         | 2.725E-09                          | 9.948E-01          | 7.046E+02        | -9.114E+01           |
| ReO <sub>2</sub>                | $P2_1/c$     | -2650.94               | 2.253E+01            | 1.479E-01                          | -1.487E-04                         | 5.038E-08                          | 9.993E-01          | 1.777E+04        | -1.158E+02           |
| ReO <sub>2</sub>                | $Pbcn$       | -2675.06               | 1.948E+01            | 1.560E-01                          | -1.564E-04                         | 5.289E-08                          | 9.992E-01          | 1.892E+04        | -1.033E+02           |
| ReO <sub>3</sub>                | $Pm\bar{3}m$ | -3335.20               | 2.926E+01            | 1.963E-01                          | -1.959E-04                         | 6.608E-08                          | 9.991E-01          | 2.433E+04        | -1.491E+02           |
| Re <sub>2</sub> O <sub>7</sub>  | $P2_12_12_1$ | -7204.91               | 7.786E+01            | 3.644E-01                          | -3.438E-04                         | 1.117E-07                          | 9.989E-01          | 5.656E+04        | -3.295E+02           |
| Rh                              | $Fm\bar{3}m$ | -764.58                | 2.110E+01            | 1.175E-02                          | -1.239E-05                         | 4.327E-09                          | 9.918E-01          | 1.130E+03        | -9.122E+01           |
| Rh <sub>2</sub> O <sub>3</sub>  | $Pbca$       | -3378.95               | 3.661E+01            | 2.544E-01                          | -2.590E-04                         | 8.847E-08                          | 9.986E-01          | 2.884E+04        | -1.944E+02           |
| Rh <sub>2</sub> O <sub>3</sub>  | $R\bar{3}c$  | -3374.05               | 3.671E+01            | 2.544E-01                          | -2.591E-04                         | 8.851E-08                          | 9.986E-01          | 2.877E+04        | -1.949E+02           |
| RhO <sub>2</sub>                | $P4_2/mnm$   | -1997.48               | 1.898E+01            | 1.580E-01                          | -1.588E-04                         | 5.378E-08                          | 9.992E-01          | 1.896E+04        | -1.026E+02           |
| W                               | $Im\bar{3}m$ | -1323.22               | 2.162E+01            | 1.017E-02                          | -1.073E-05                         | 3.748E-09                          | 9.929E-01          | 9.754E+02        | -9.174E+01           |
| WO <sub>2</sub>                 | $P2_1/c$     | -2875.14               | 2.370E+01            | 1.453E-01                          | -1.465E-04                         | 4.972E-08                          | 9.993E-01          | 1.724E+04        | -1.214E+02           |
| W <sub>18</sub> O <sub>49</sub> | $P2/m$       | -61488.57              | 5.522E+02            | 3.128E+00                          | -3.123E-03                         | 1.053E-06                          | 9.852E-01          | 3.885E+05        | -2.740E+03           |
| WO <sub>3</sub>                 | $P2_1/c$     | -3610.59               | 3.594E+01            | 1.713E-01                          | -1.674E-04                         | 5.570E-08                          | 9.993E-01          | 2.332E+04        | -1.705E+02           |
| WO <sub>3</sub>                 | $Pnma$       | -3610.16               | 3.668E+01            | 1.699E-01                          | -1.658E-04                         | 5.511E-08                          | 9.993E-01          | 2.329E+04        | -1.726E+02           |
| WO <sub>3</sub>                 | $P4/ncc$     | -3610.59               | 3.594E+01            | 1.713E-01                          | -1.674E-04                         | 5.570E-08                          | 9.993E-01          | 2.332E+04        | -1.705E+02           |
| Pt <sub>2</sub> W               | $Immm$       | -2750.89               | 6.727E+01            | 2.274E-02                          | -2.401E-05                         | 8.397E-09                          | 9.840E-01          | 2.170E+03        | -2.753E+02           |
| PtW                             | $P\bar{6}m2$ | -2006.78               | 4.503E+01            | 1.491E-02                          | -1.574E-05                         | 5.503E-09                          | 9.895E-01          | 1.423E+03        | -1.831E+02           |

$$G(T) = H(T) + TS(T) = E_{corr} + H_{vib}(T) - TS_{vib}(T)$$

$$C_{vib}(T) = a + bT + cT^2 + dT^3 - e/T^2$$

$$H_{vib}(T) = aT + bT^2/2 + cT^3/3 + dT^4/4 - e/T + f$$

$$S_{vib}(T) = a \ln(T) + bT + cT^2/2 + dT^3/3 - e/2T^2 + g$$

**Tab. S3:** Comparison of several dispersion correction methods available in VASP 5 and VASP 6 for the Pt(II)-oxides. All calculations employed the PBE functional. While the energies of formation ( $\Delta E_f$ ) listed here are not directly comparable to experimental data, none of the methods except PBE-D3/BJ provides a reasonable estimate for the enthalpy of formation of gaseous PtO<sub>2</sub> (see Tab. S1), which is critical for this investigation. At the same time, based on the *c*-lattice parameter PBE-D3/BJ determines the best geometries.

|             | O <sub>2</sub>       |                      | Pt                |                      | $\alpha$ -PtO <sub>2</sub> |                   | $\beta$ -PtO <sub>2</sub> |                          | PtO <sub>2</sub> (g) |                      |                          |
|-------------|----------------------|----------------------|-------------------|----------------------|----------------------------|-------------------|---------------------------|--------------------------|----------------------|----------------------|--------------------------|
|             | <i>E</i><br>[kJ/mol] | <i>E</i><br>[kJ/mol] | <i>c</i><br>[Å]   | <i>E</i><br>[kJ/mol] | $\Delta E_f$<br>[kJ/mol]   | <i>c</i><br>[Å]   | <i>E</i><br>[kJ/mol]      | $\Delta E_f$<br>[kJ/mol] | <i>c</i><br>[Å]      | <i>E</i><br>[kJ/mol] | $\Delta E_f$<br>[kJ/mol] |
| EXP         | ---                  | ---                  | 3.92 <sup>1</sup> | ---                  | ---                        | 4.16 <sup>2</sup> | ---                       | ---                      | 3.14 <sup>3</sup>    | ---                  | ---                      |
| PBE         | -951.34              | -587.75              | 3.97              | -1684.36             | -145.28                    | 4.63              | -1685.72                  | -146.63                  | 3.18                 | -1449.60             | 89.49                    |
| MBD@rSC/FI  | -951.34              | -587.73              | 3.97              | -1684.88             | -145.81                    | 4.78              | -1685.93                  | -146.86                  | 3.18                 | -1449.60             | 89.47                    |
| DDsC        | -951.34              | -587.73              | 3.97              | -1684.88             | -145.81                    | 4.78              | -1685.93                  | -146.86                  | 3.18                 | -1449.60             | 89.47                    |
| TS/Hi       | -951.34              | -635.78              | 3.93              | -1727.13             | -140.01                    | 4.23              | -1739.30                  | -152.17                  | 3.17                 | -1449.97             | 137.16                   |
| D3/BJ       | -952.04              | -661.45              | 3.92              | -1747.75             | -134.26                    | 4.15              | -1761.17                  | -147.67                  | 3.17                 | -1453.51             | 159.99                   |
| BEEF-vdW    | -603.08              | -296.15              | 3.99              | -1056.97             | -157.74                    | 4.39              | -1062.35                  | -163.13                  | 3.19                 | -780.99              | 118.24                   |
| vdW-DF2     | -582.73              | -251.95              | 4.11              | -1039.39             | -204.71                    | 4.22              | -1054.37                  | -219.69                  | 3.26                 | -819.78              | 14.90                    |
| optB86b-vdW | -605.81              | -368.68              | 3.95              | -1156.50             | -182.01                    | 4.07              | -1170.74                  | -196.25                  | 3.17                 | -842.11              | 132.37                   |

- 1 R. W. G. Wyckoff, *Crystal Structures*, Interscience Publishers, New York, 2nd edn., 1963, **1**, 7–83.
- 2 H. R. Hoekstra, S. Siegel and F. X. Gallagher, *Advances in Chemistry*, American Chemical Society, Washington, D.C., 1971, **98**, 39–53.
- 3 K.-J. Range, F. Rau, U. Klement, A. M. Heyns, *Mater. Res. Bull.*, 1987, **22**, 1541–1547.

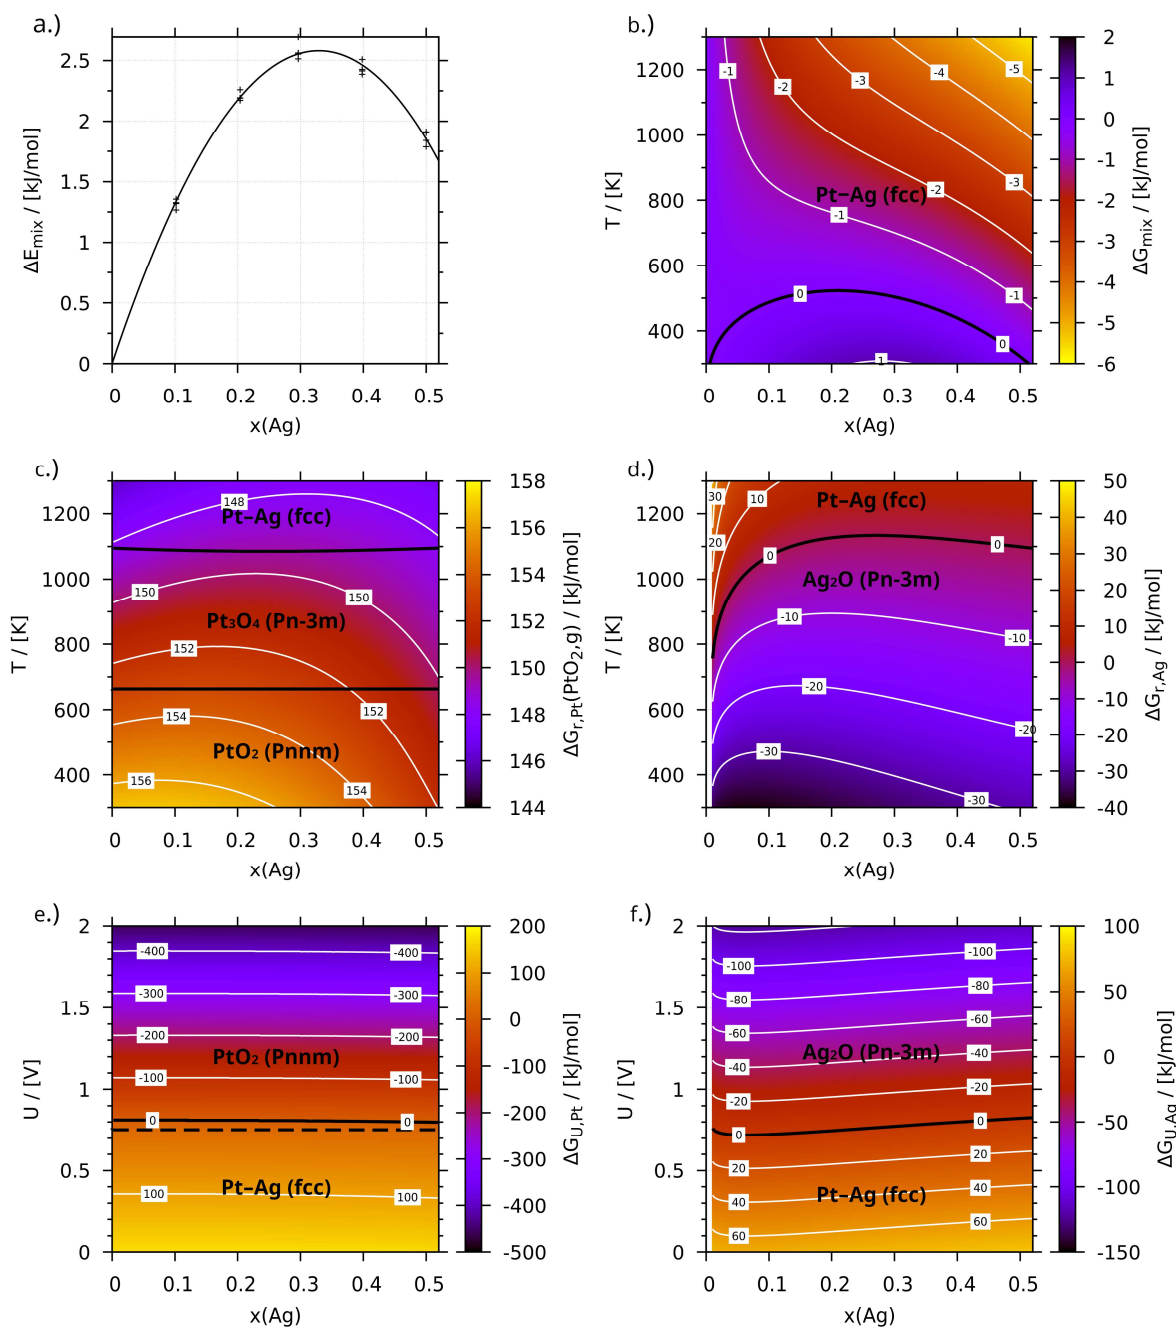

**Fig. S1:** Mixing energy (a), Gibbs free energy of mixing (b), Gibbs free energy of  $\text{PtO}_2$  formation (c), Gibbs free energy of silver oxidation (d), Gibbs free energy of electrochemical platinum oxidation ( $pH=0$ ,  $T=298.15$  K) (e) and Gibbs free energy of electrochemical silver oxidation ( $pH=0$ ,  $T=298.15$  K) (f) of Pt-Ag. Phases and their boundaries are signified in black.

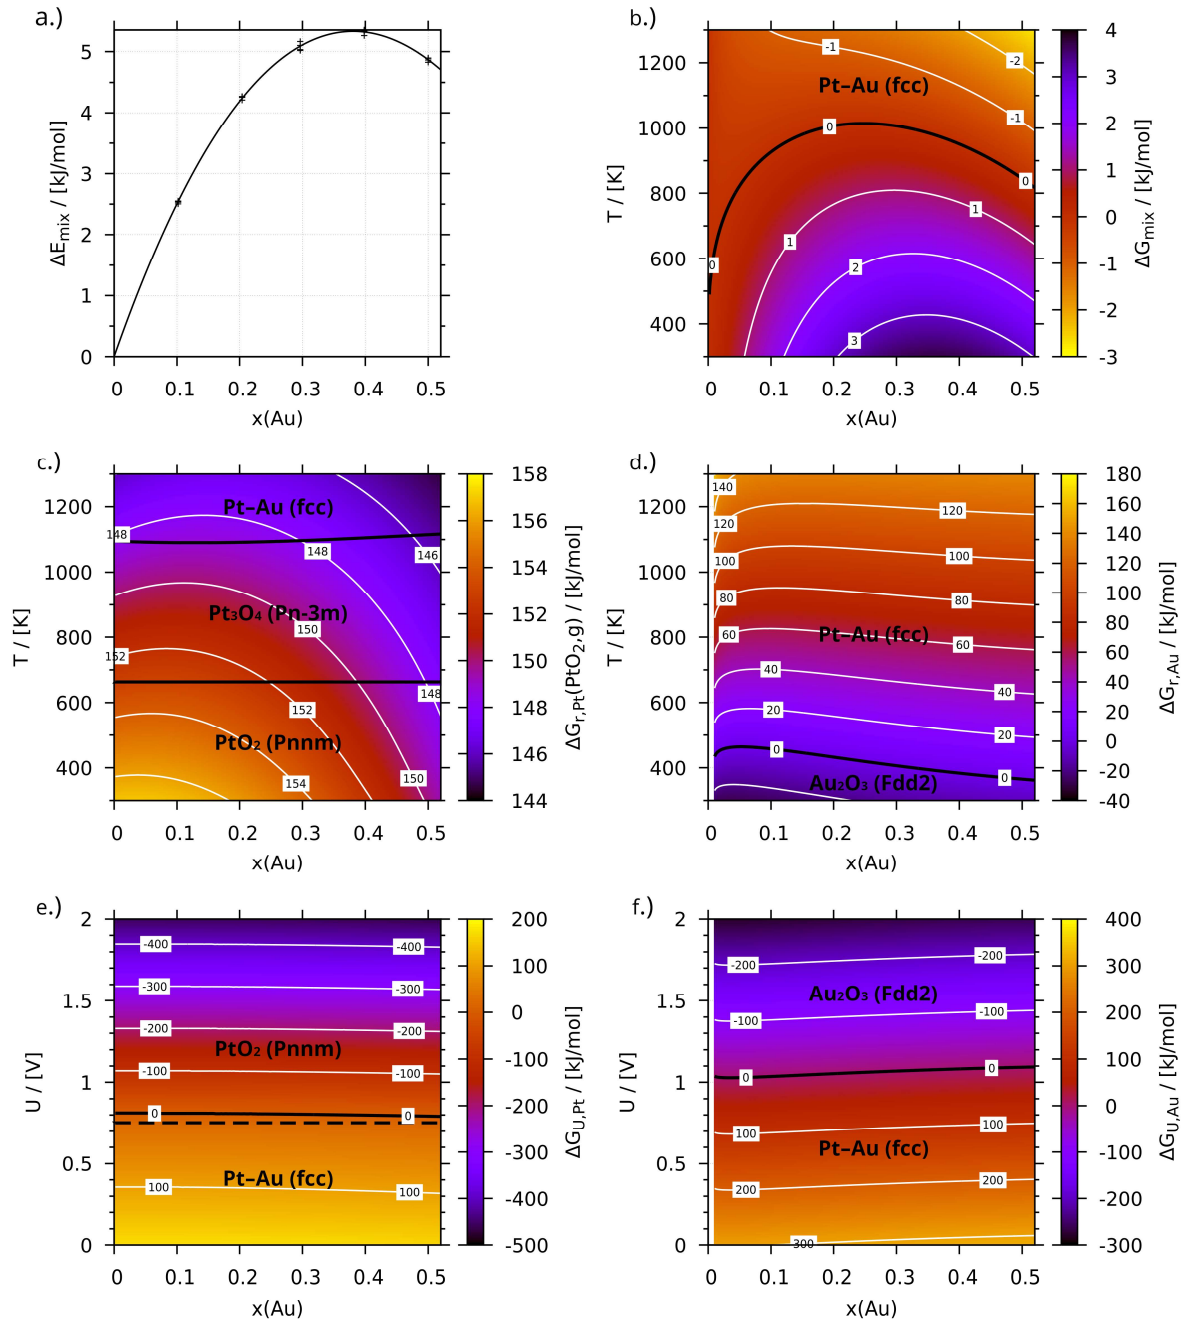

**Fig. S2:** Mixing energy (a), Gibbs free energy of mixing (b), Gibbs free energy of  $\text{PtO}_2$  formation (c), Gibbs free energy of gold oxidation (d), Gibbs free energy of electrochemical platinum oxidation ( $pH=0$ ,  $T=298.15$  K) (e) and Gibbs free energy of electrochemical gold oxidation ( $pH=0$ ,  $T=298.15$  K) (f) of Pt-Au. Phases and their boundaries are signified in black.

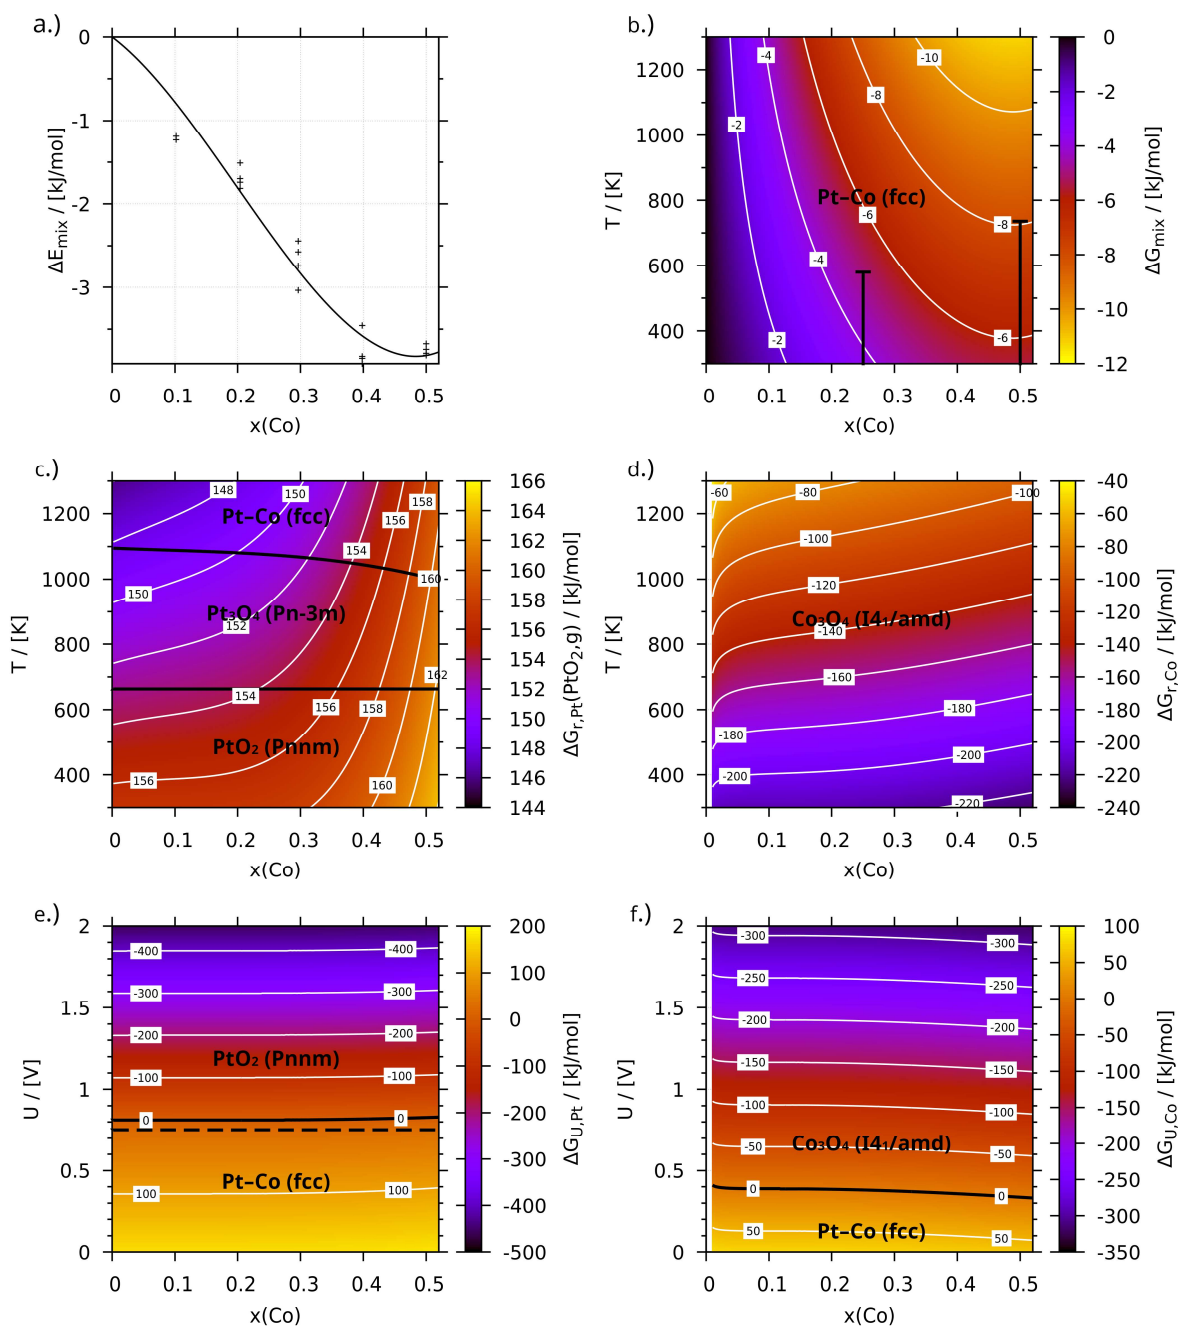

**Fig. S3:** Mixing energy (a), Gibbs free energy of mixing (b), Gibbs free energy of  $\text{PtO}_2$  formation (c), Gibbs free energy of cobalt oxidation (d), Gibbs free energy of electrochemical platinum oxidation ( $pH=0$ ,  $T=298.15$  K) (e) and Gibbs free energy of electrochemical cobalt oxidation ( $pH=0$ ,  $T=298.15$  K) (f) of Pt-Co. Phases and their boundaries are signified in black. The  $Fd\bar{3}m$ -structure of  $\text{Co}_3\text{O}_4$  is deformed due to its magnetic structure.



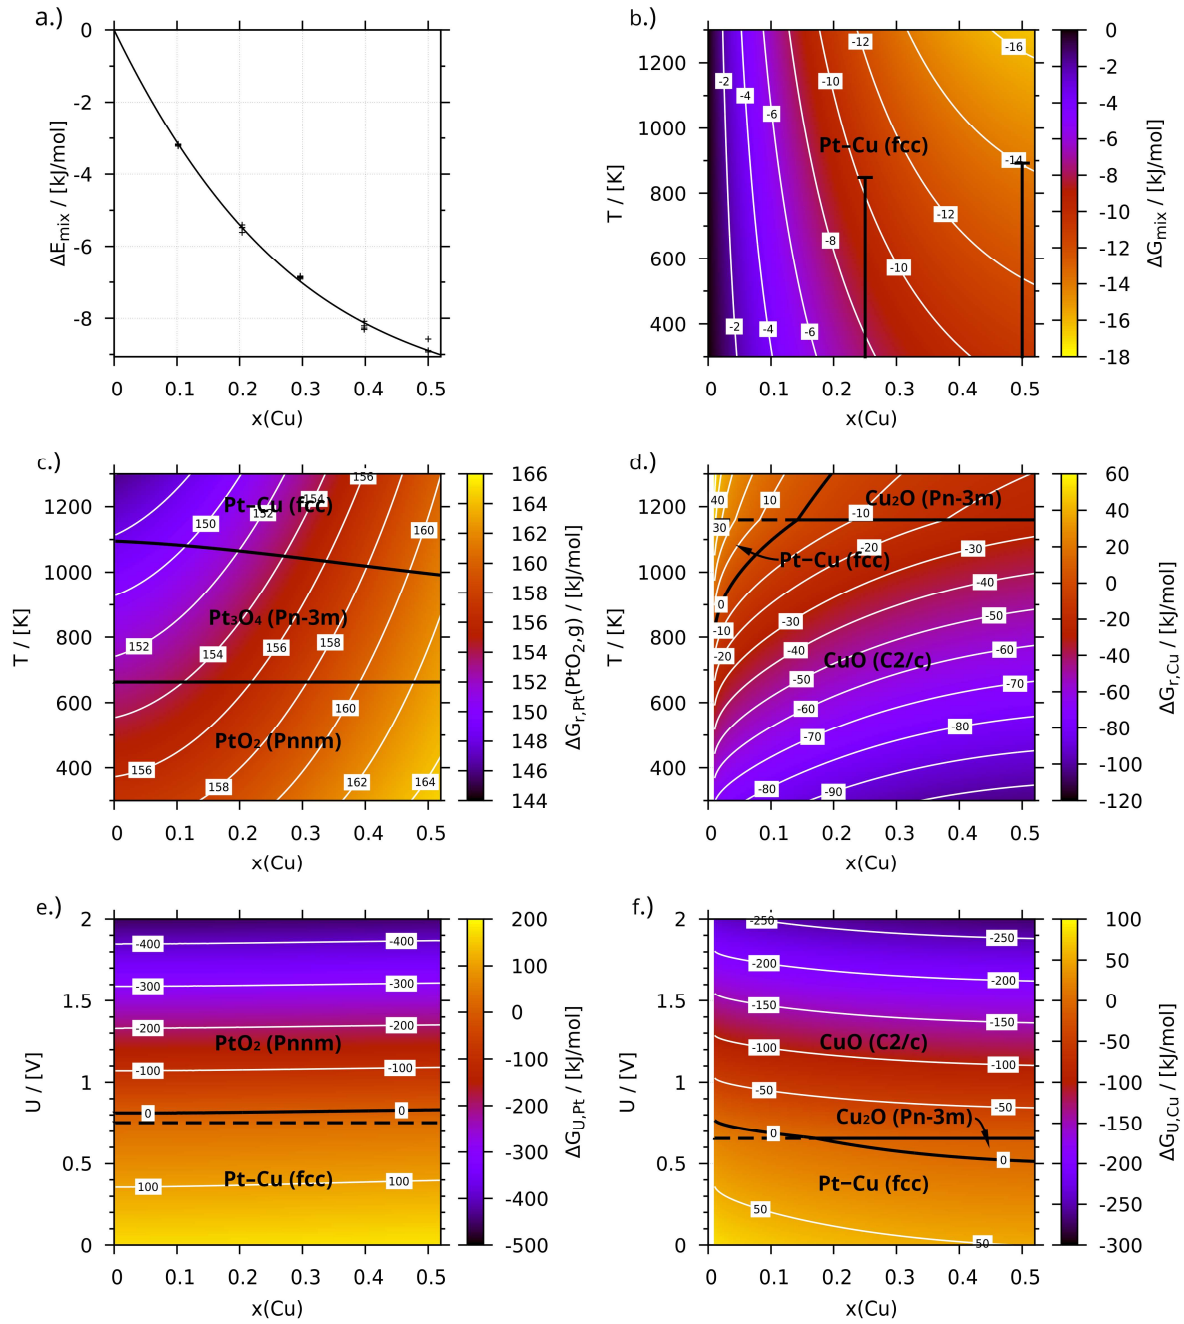

**Fig. S4:** Mixing energy (a), Gibbs free energy of mixing (b), Gibbs free energy of  $\text{PtO}_2$  formation (c), Gibbs free energy of copper oxidation (d), Gibbs free energy of electrochemical platinum oxidation ( $pH=0$ ,  $T=298.15$  K) (e) and Gibbs free energy of electrochemical copper oxidation ( $pH=0$ ,  $T=298.15$  K) (f) of Pt-Cu. Phases and their boundaries are signified in black.

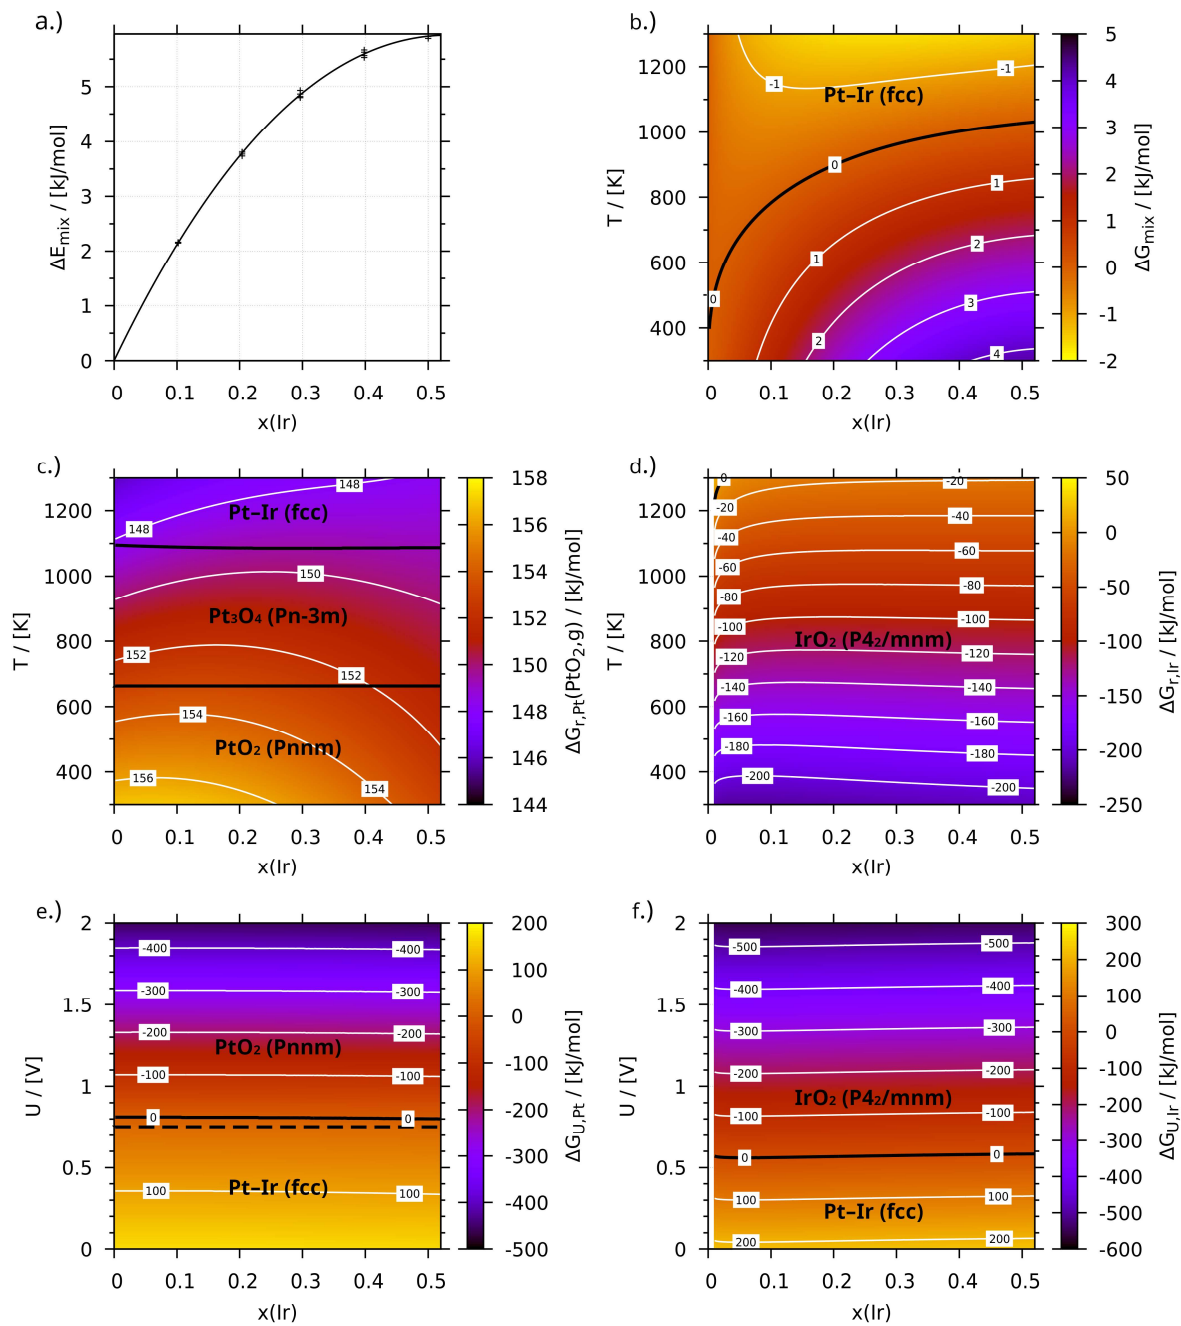

**Fig. S5:** Mixing energy (a), Gibbs free energy of mixing (b), Gibbs free energy of  $\text{PtO}_2$  formation (c), Gibbs free energy of iridium oxidation (d), Gibbs free energy of electrochemical platinum oxidation ( $pH=0$ ,  $T=298.15$  K) (e) and Gibbs free energy of electrochemical iridium oxidation ( $pH=0$ ,  $T=298.15$  K) (f) of Pt-Ir. Phases and their boundaries are signified in black.

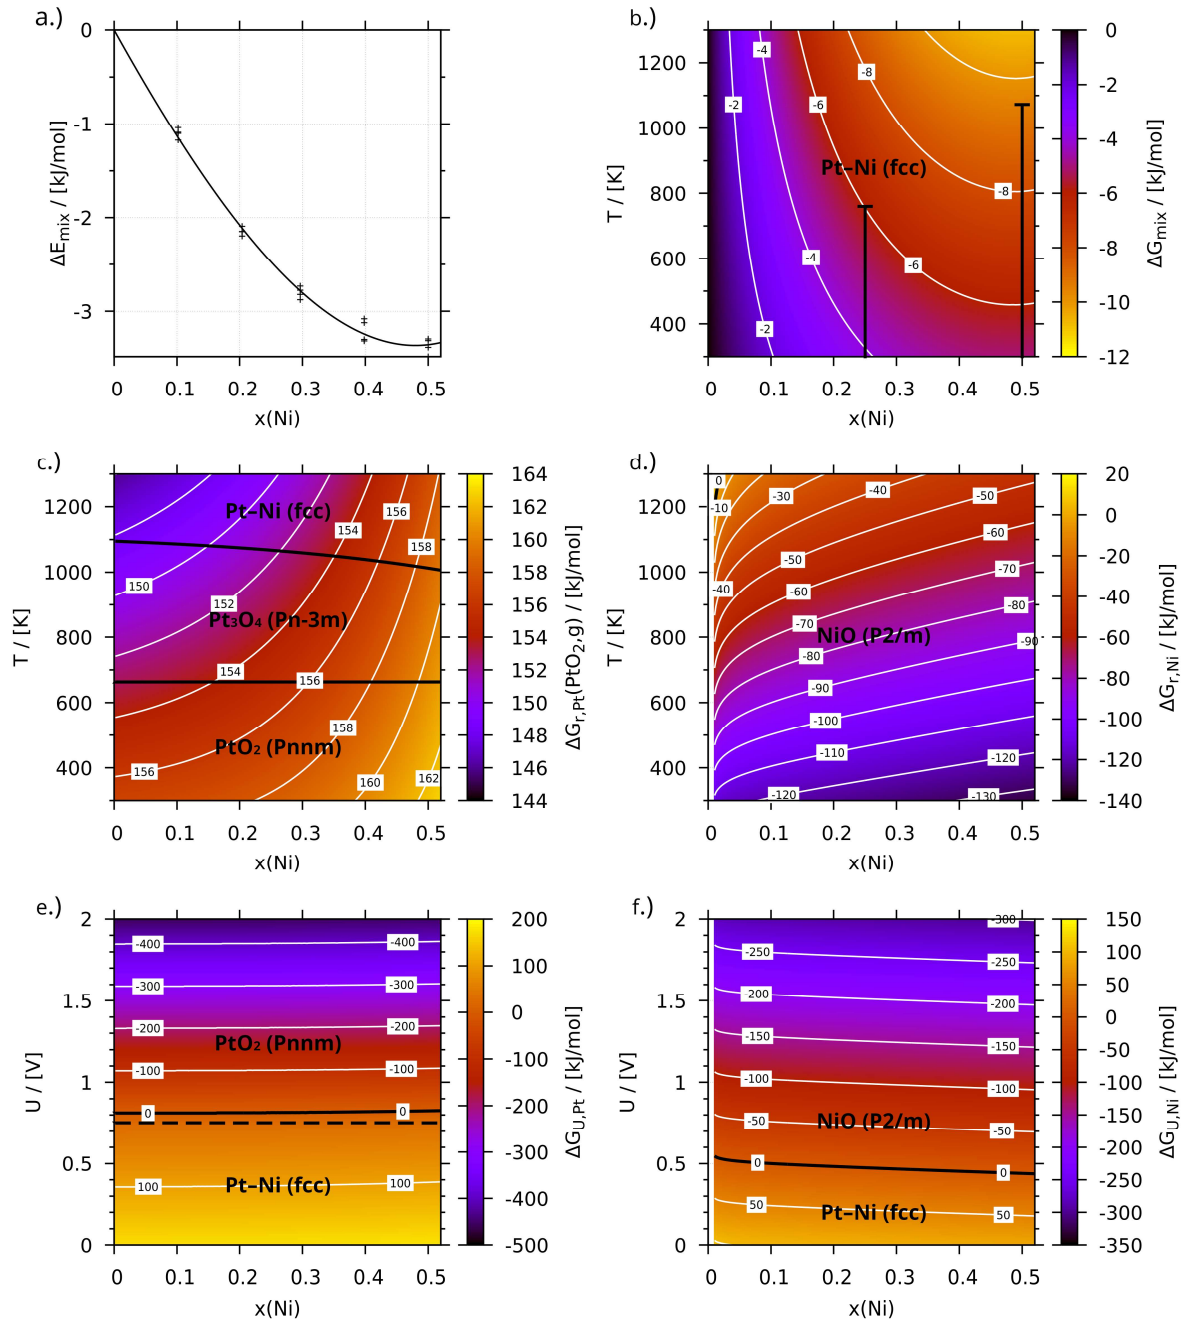

**Fig. S6:** Mixing energy (a), Gibbs free energy of mixing (b), Gibbs free energy of  $\text{PtO}_2$  formation (c), Gibbs free energy of nickel oxidation (d), Gibbs free energy of electrochemical platinum oxidation ( $pH=0$ ,  $T=298.15$  K) (e) and Gibbs free energy of electrochemical nickel oxidation ( $pH=0$ ,  $T=298.15$  K) (f) of Pt–Ni. Phases and their boundaries are signified in black. The  $Fm\bar{3}m$ -structure of NiO is distorted due to its magnetic structure.

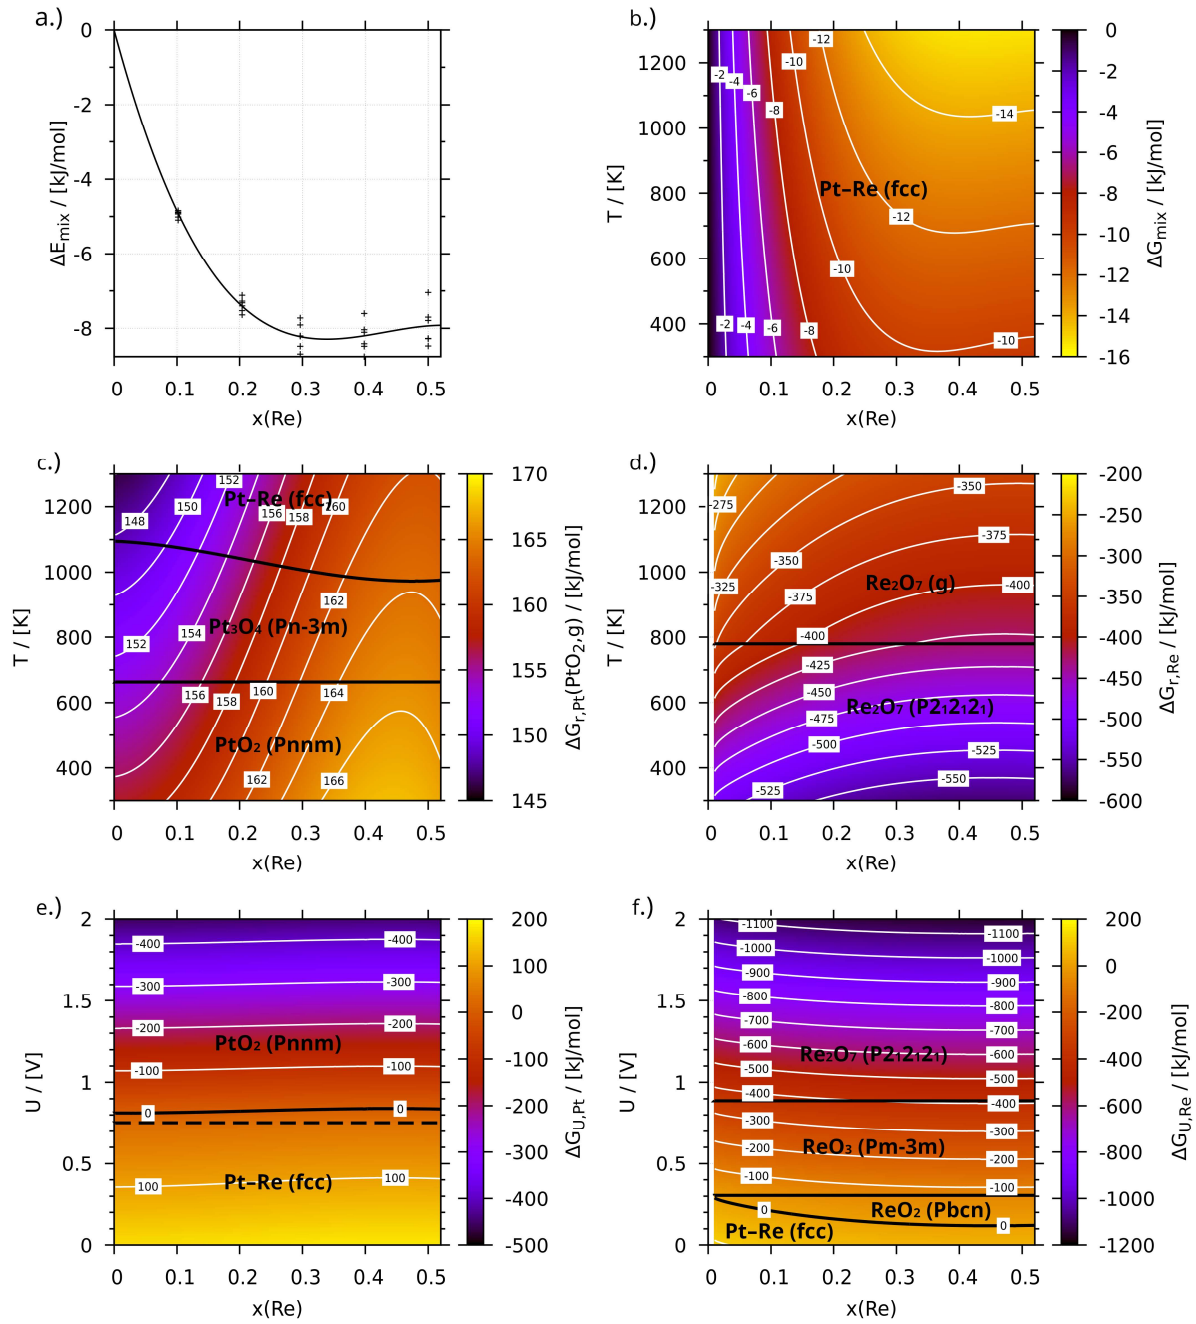

**Fig. S7:** Mixing energy (a), Gibbs free energy of mixing (b), Gibbs free energy of  $\text{PtO}_2$  formation (c), Gibbs free energy of rehenium oxidation (d), Gibbs free energy of electrochemical platinum oxidation ( $pH=0$ ,  $T=298.15$  K) (e) and Gibbs free energy of electrochemical rehenium oxidation ( $pH=0$ ,  $T=298.15$  K) (f) of Pt-Re. Phases and their boundaries are signified in black.

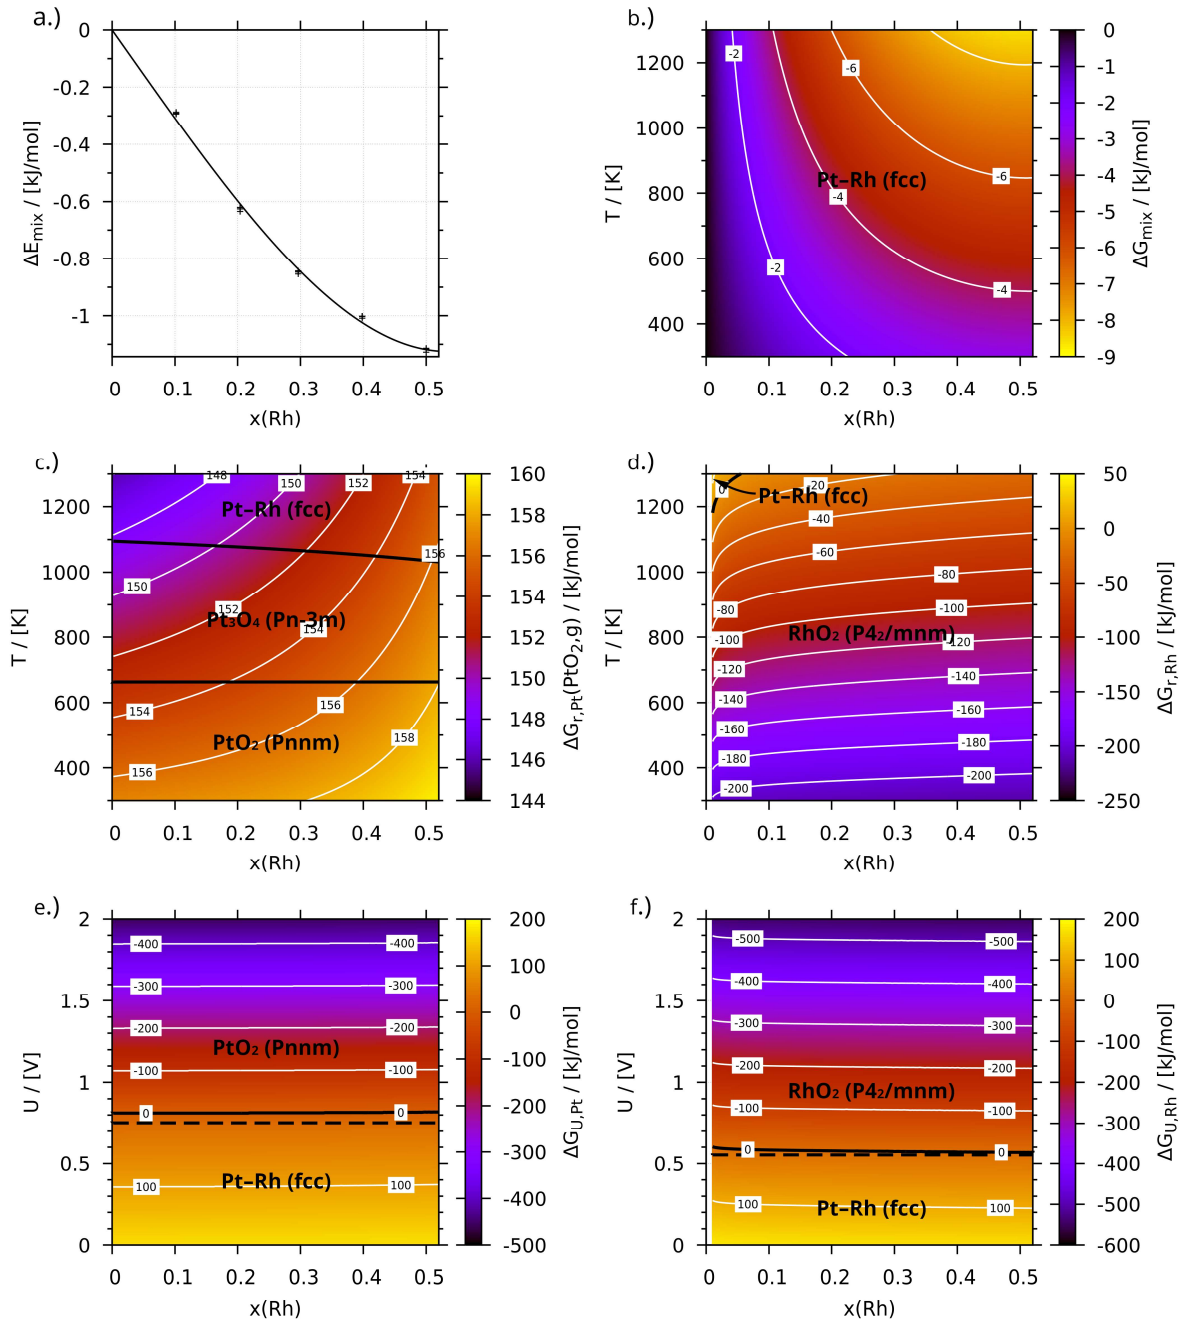

**Fig. S8:** Mixing energy (a), Gibbs free energy of mixing (b), Gibbs free energy of  $\text{PtO}_2$  formation (c), Gibbs free energy of rhodium oxidation (d), Gibbs free energy of electrochemical platinum oxidation ( $pH=0$ ,  $T=298.15$  K) (e) and Gibbs free energy of electrochemical rhodium oxidation ( $pH=0$ ,  $T=298.15$  K) (f) of Pt-Rh. Phases and their boundaries are signified in black.

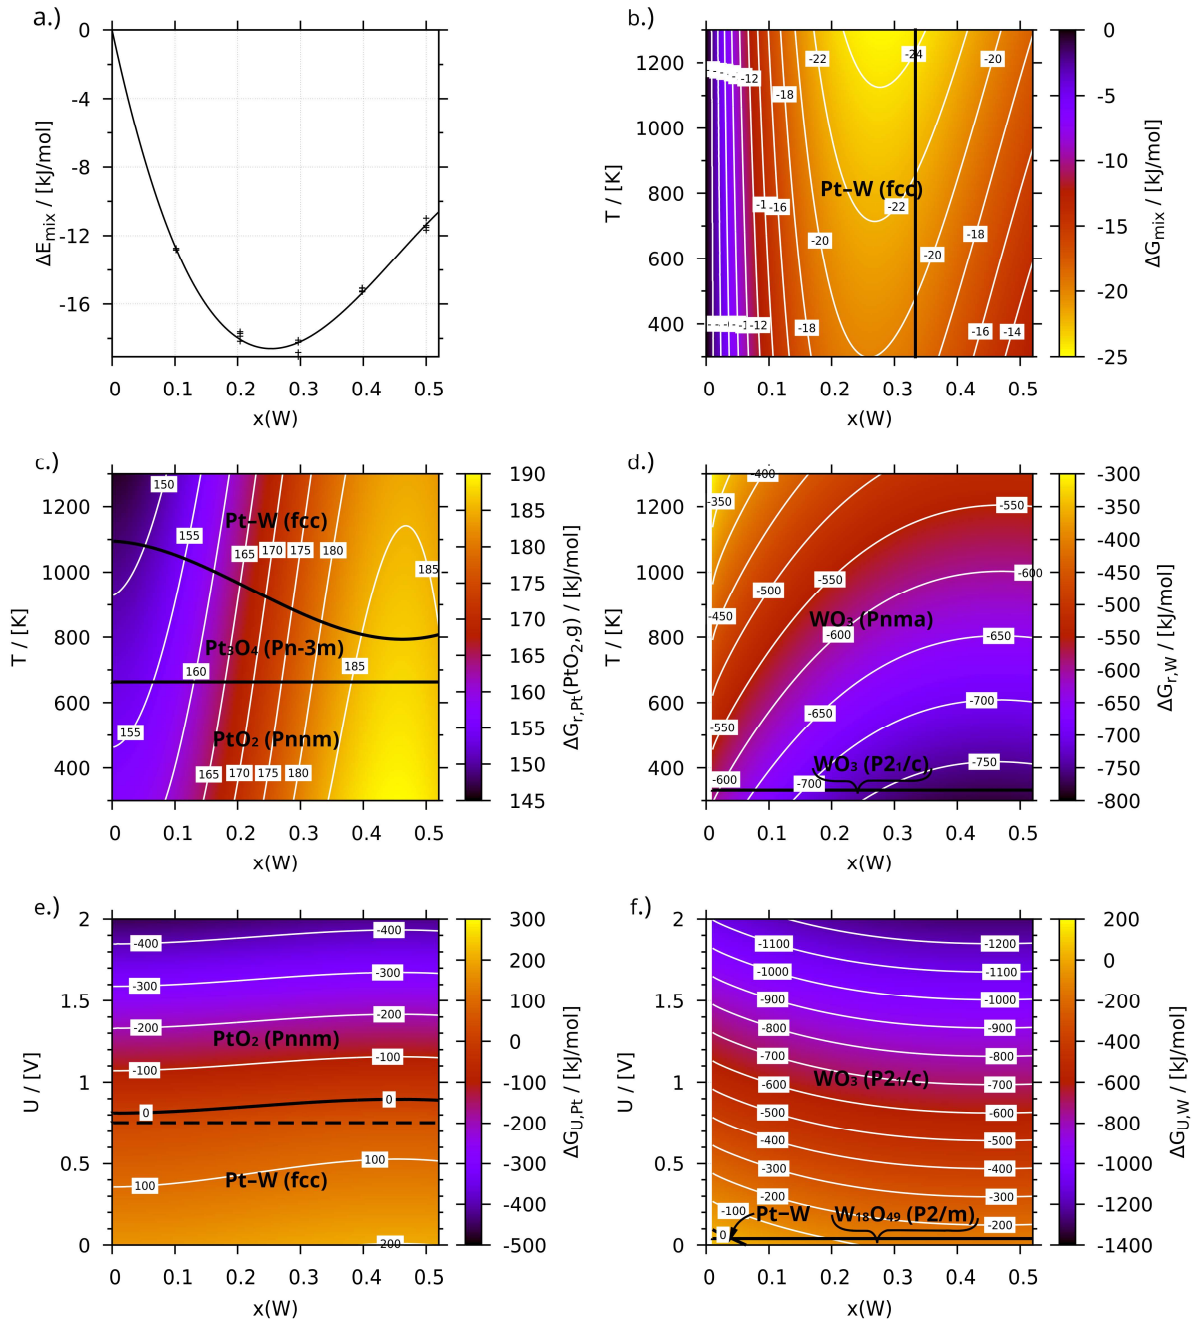

**Fig. S9:** Mixing energy (a), Gibbs free energy of mixing (b), Gibbs free energy of PtO<sub>2</sub> formation (c), Gibbs free energy of tungsten oxidation (d), Gibbs free energy of electrochemical platinum oxidation ( $pH=0$ ,  $T=298.15$  K) (e) and Gibbs free energy of electrochemical tungsten oxidation ( $pH=0$ ,  $T=298.15$  K) (f) of Pt-W. Phases and their boundaries are signified in black.

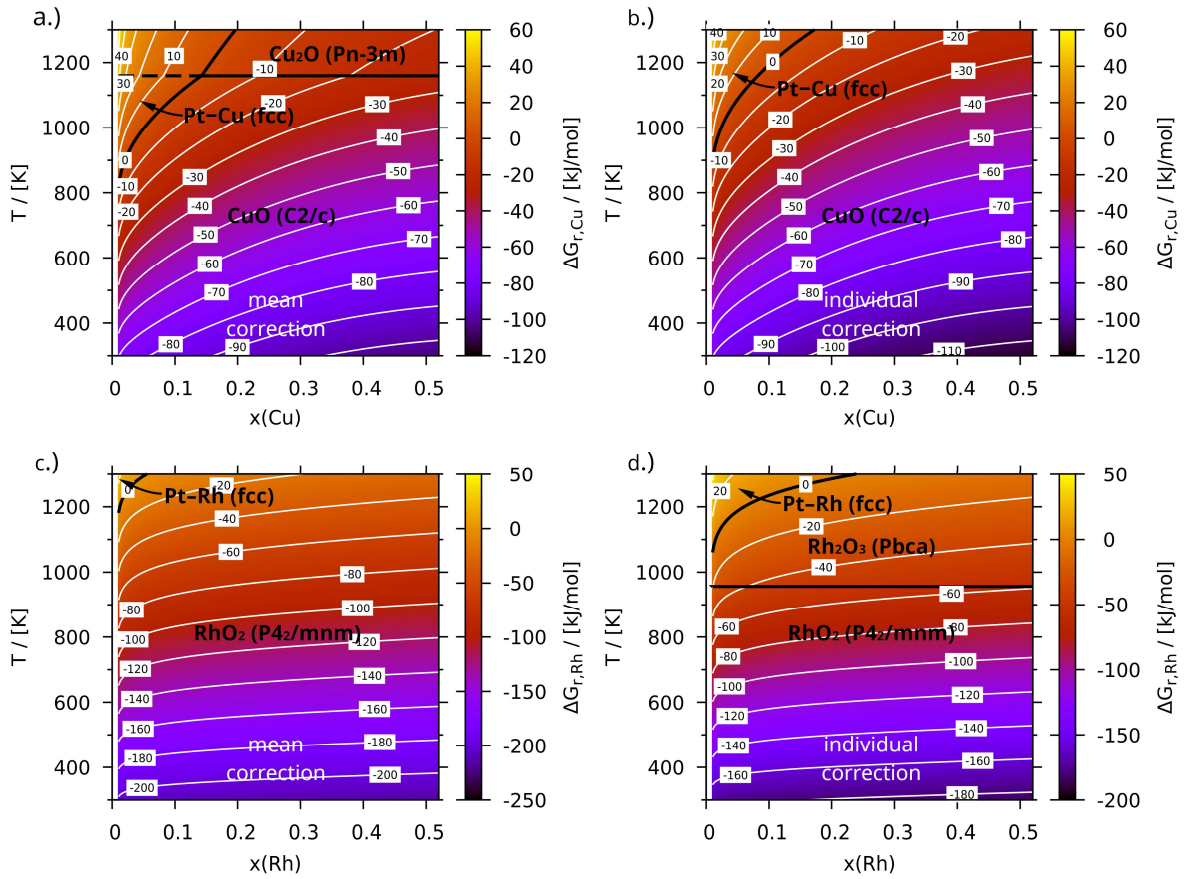

**Fig. S10:** Gibbs free energy of copper- (a,b) and rhodium oxidation (c,d) with mean empirical and individual correction based on the oxide enthalpies of formation. Phases and their boundaries are signified in black.
